# Supplementary material
Source: publisher figshare collection journal article supplement (https://acs.figshare.com/ndownloader/files/9298216)
Supplement: Supplementary file 1 [file 9298216]

## Supporting Information

# Catalytic Palladium Film Deposited by Scalable Low-Temperature Aqueous Combustion

Albert A. Voskanyan, Chi-Ying Vanessa Li, and Kwong-Yu Chan\*

The Department of Chemistry, The University of Hong Kong, Pokfulam Road, Hong Kong.

\*Email: [hrccky@hku.hk](mailto:hrccky@hku.hk)

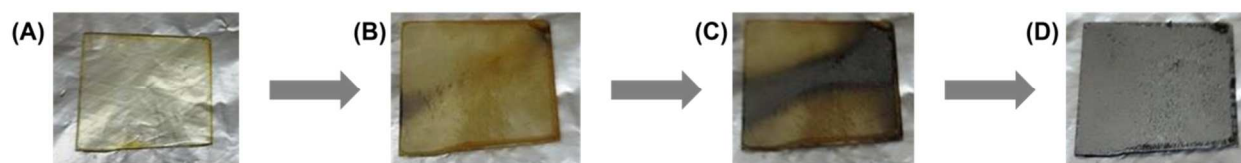

**Figure S1.** (A) Precursor solution on glass substrate (B) Gel formed after heating precursor solution at 250 °C, (C) Combustion with a front propagation, and (D) Formed Pd film on glass substrate after combustion.

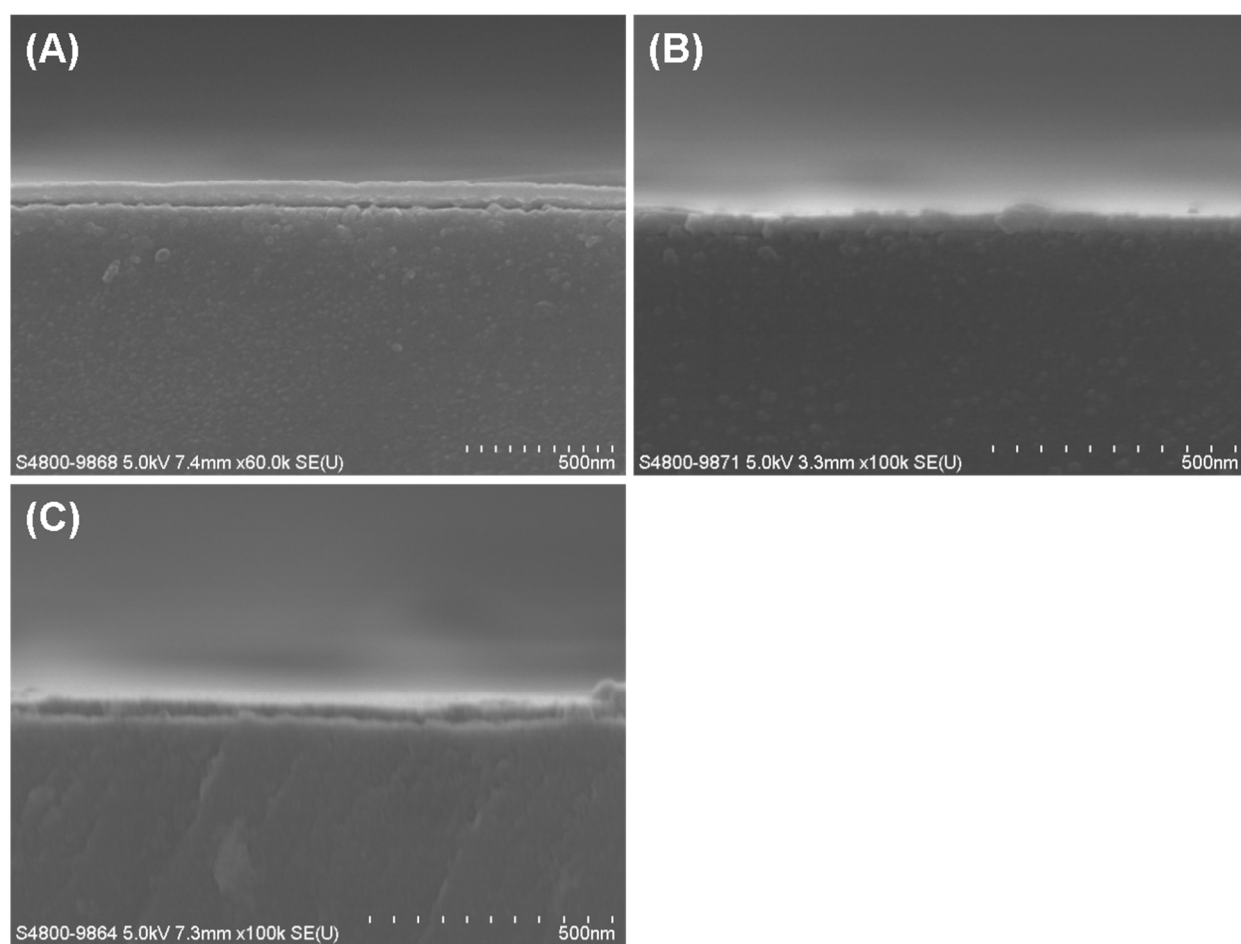

**Figure S2.** SEM cross-sectional images of Pd films deposited at different rotation speeds (A) 2000 (B) 3000, and (C) 5000 rpm respectively.

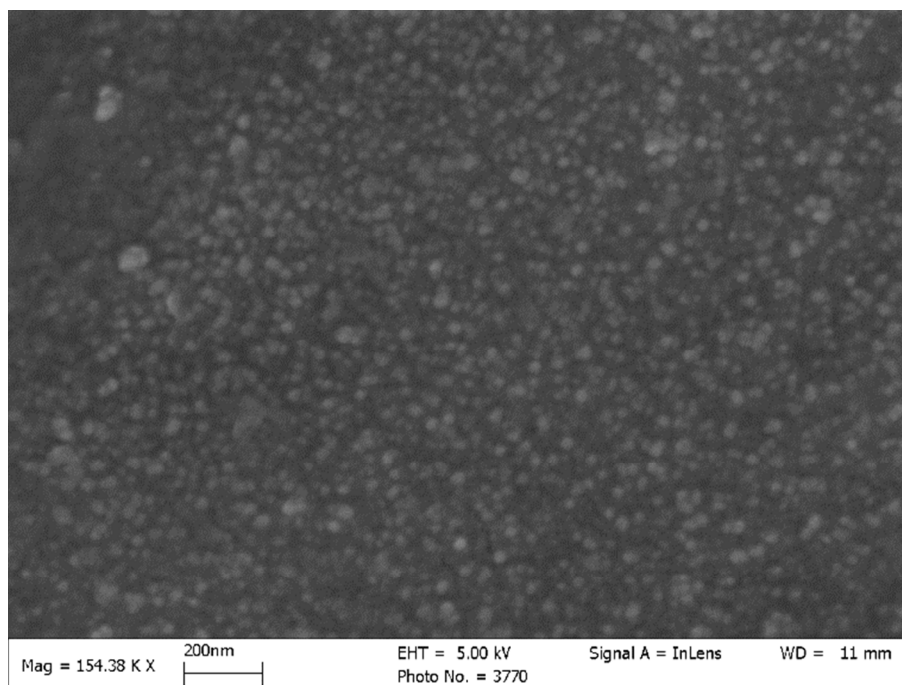

**Figure S3.** SEM image of the Pd film surface.

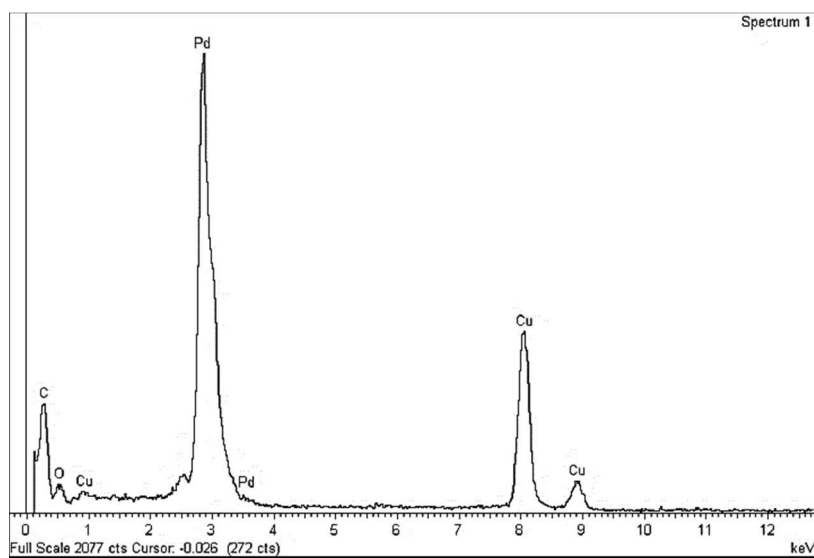

**Figure S4.** EDX spectra of the palladium film deposited by aqueous combustion method.

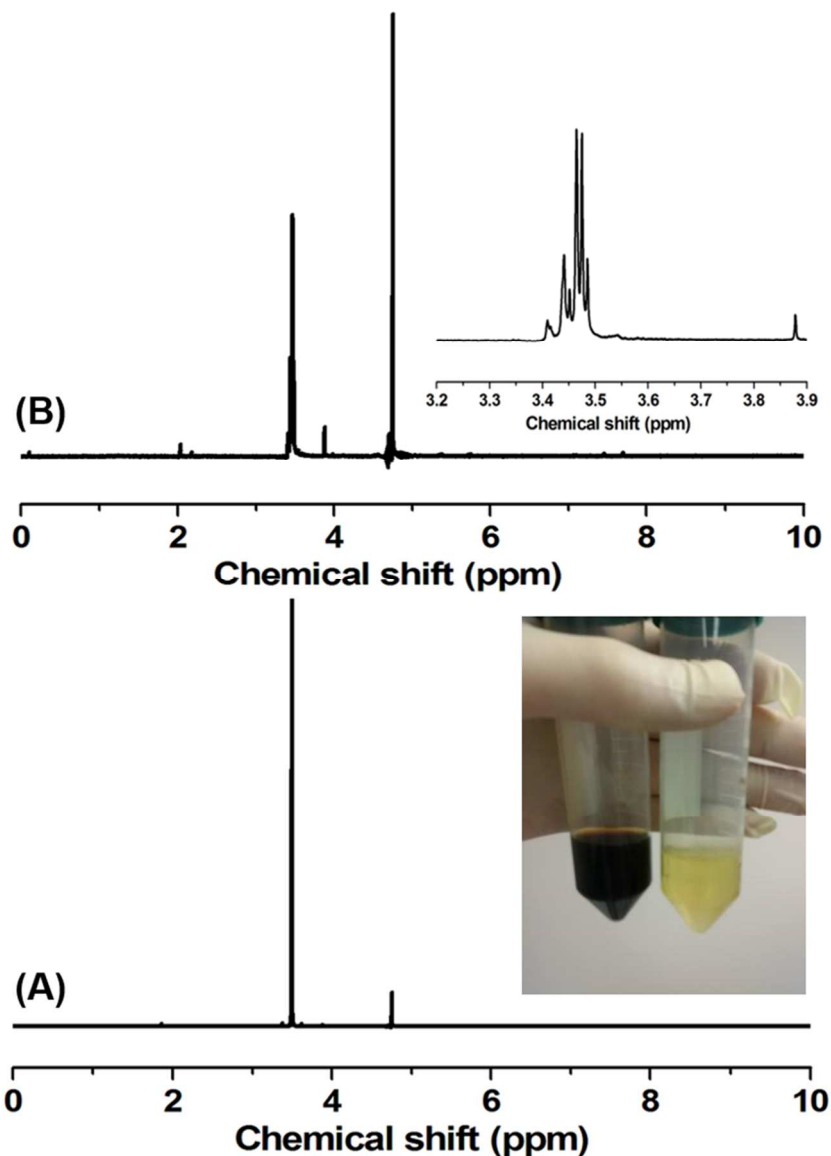

**Figure S5.**  $^1\text{H}$ -NMR spectra of (A) glycine and (B) palladium nitrate-glycine precursor solution with 1:2 stoichiometric ratio heated at 80 °C (inset: image demonstrating color change of precursor solution from dark brown to pale yellow after heating to 80 °C).

Compared to pure  $\text{NH}_2\text{CH}_2\text{COOH}$  splitting at 3.45 ppm is observed indicating that the proton in methylene group has a different chemical environment and more shielded associated with the chelate formation (Figure S4A). The peak at 4.8 ppm is due to  $\text{D}_2\text{O}$  solvent.

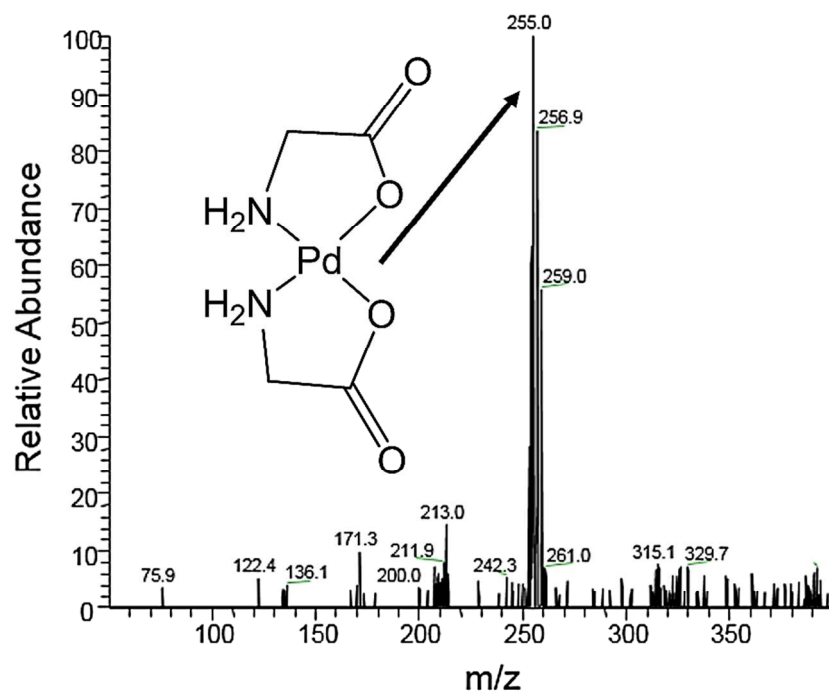

**Figure S6.** ESI-MS spectra of the palladium nitrate-glycine precursor solution with 1:2 stoichiometric ratio heated at 80 °C.

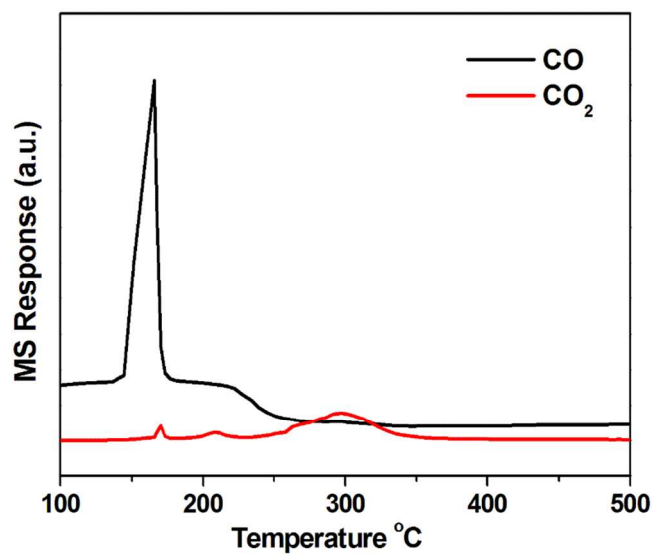

**Figure S7.** MS analysis of CO and CO<sub>2</sub> produced from combustion of Pd(NO<sub>3</sub>)<sub>2</sub>-NH<sub>2</sub>CH<sub>2</sub>-COOH=1:2 precursor mixture.

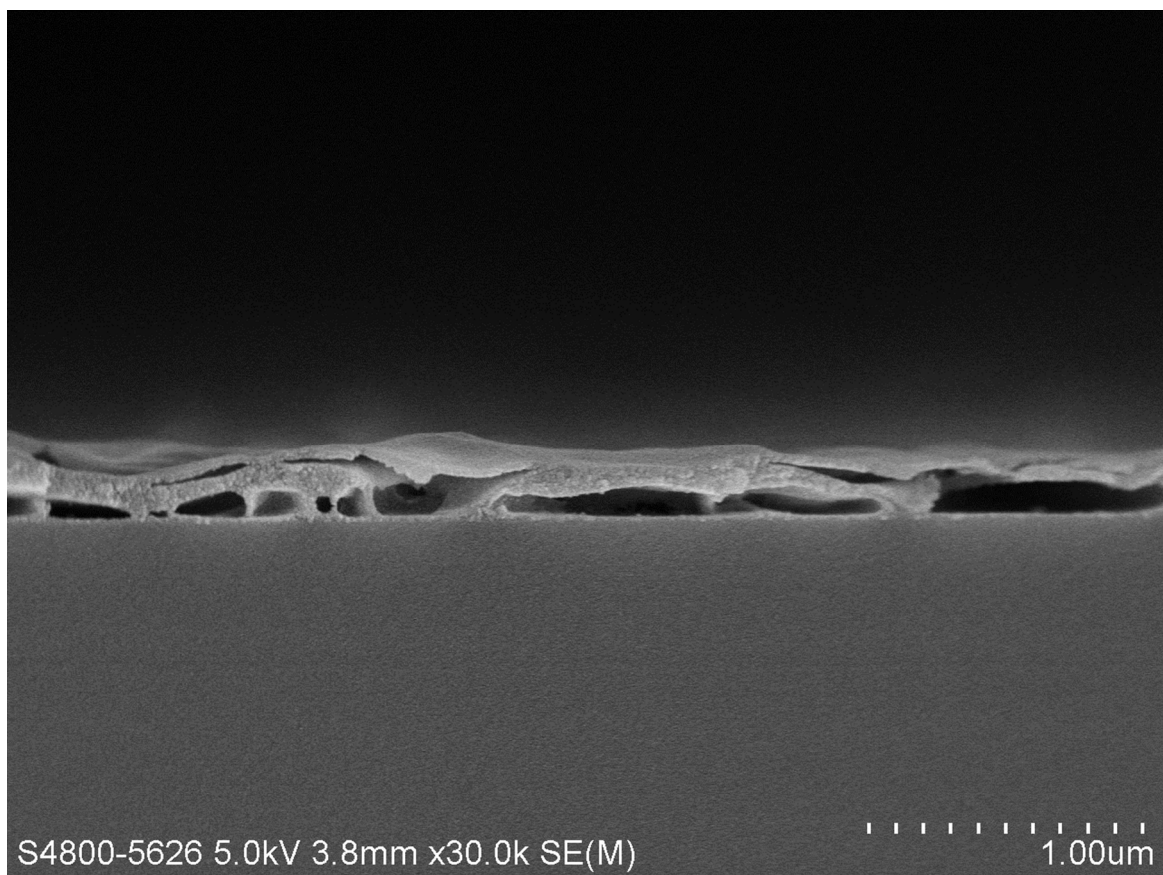

**Figure S8.** SEM cross-sectional image of Pd film deposited from precursor solution with  $\text{Pd}(\text{NO}_3)_2\text{:NH}_2\text{CH}_2\text{COOH}$  = 1:2 molar ratio.

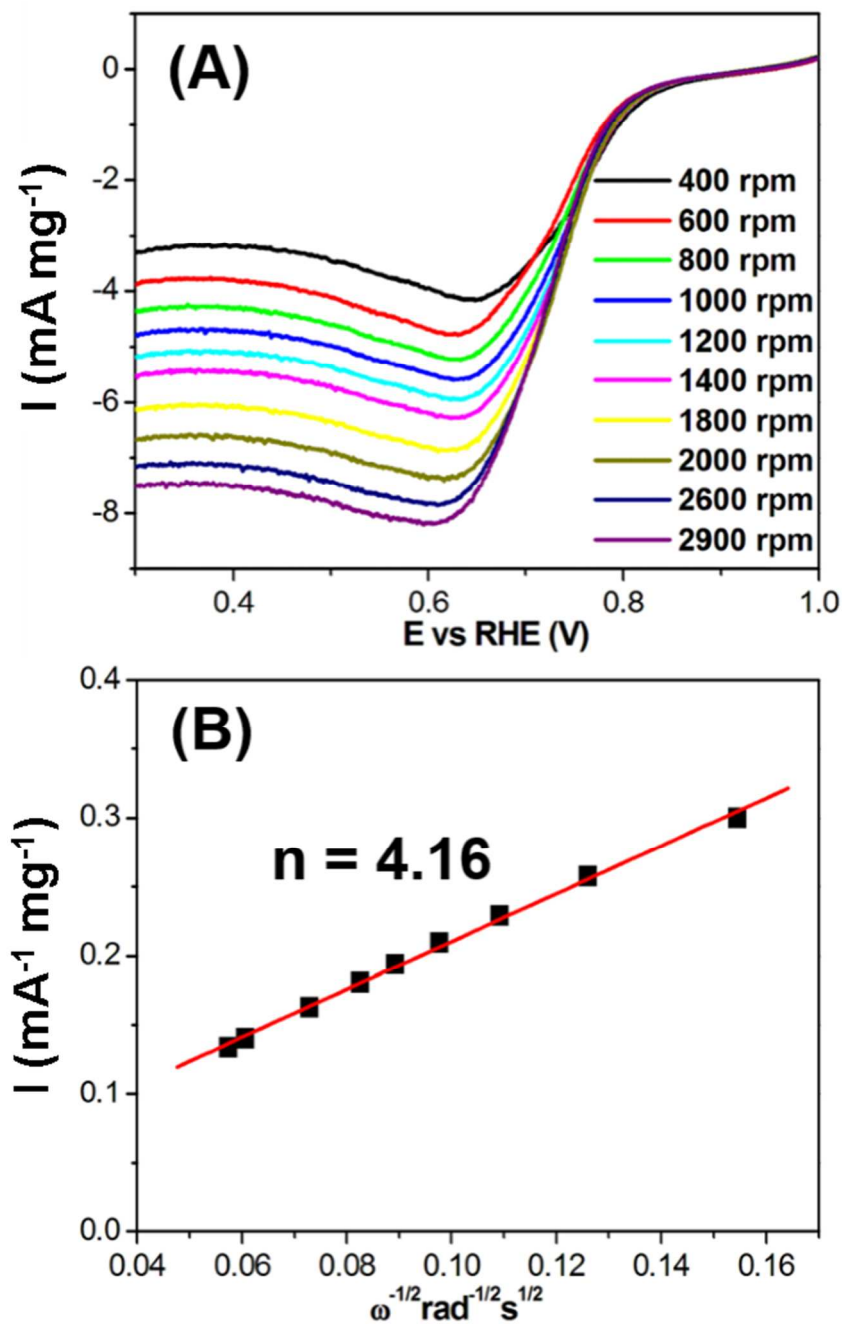

**Figure S9.** (A) ORR polarization curves for Pd film obtained in an oxygen saturated 0.1 M NaOH solution at a scan rate of  $10 \text{ mV s}^{-1}$  and different rotation rates and (B) Koutecky-Levich plot of  $I^{-1}$  versus  $\omega^{-1/2}$  at 0.3 V vs RHE.
